# Supplementary material for: HSPA1A-siRNA nucleated gold nanorods for stimulated photothermal therapy through strategic heat shock to HSP70
Source: Royal Society of Chemistry journal article supplement (doi:10.1039/d1qm00630d), 2021-01-01
Supplement: d1qm00630d1.pdf [file d1qm00630d1.pdf]

## Supplementary Information

### **HSPA1A-siRNA nucleated gold nanorods for stimulated photothermal therapy through strategic heat shock to HSP70**

Beom-Su Kim<sup>a, †</sup>, Dinesh Kumar<sup>b,c, †</sup>, Chan Hee Park<sup>a,c,d,e\*</sup>, Cheol Sang Kim<sup>a,c,d,e\*</sup>

*<sup>a</sup>Carbon Nano Convergence Technology Center for Next Generation Engineers (CNN), Jeonbuk National University, 567 Baekje-daero, Deokjin-gu, Jeonju-si, Jeollabuk-do 54896, South Korea*

*<sup>b</sup>Department of Bionanosystem Engineering, Graduate School Jeonbuk National University, Jeonju 54896, South Korea*

*<sup>c</sup>Department of Bionanotechnology and Bioconvergence Engineering, Graduate School, Jeonbuk National University, Jeonju 54896, South Korea*

*<sup>d</sup>Division of Mechanical Design Engineering, Jeonbuk National University, Jeonju 54896, South Korea*

*<sup>e</sup>Eco-Friendly Machine Parts Design Research Center, Jeonbuk National University, Jeonju 54896, South Korea*

**Table S1.** Zeta-potential analysis of GNRs and siRNA.

| <b>S. No.</b> | <b>Sample</b> | <b>Zeta Potential (mV)</b> |
|---------------|---------------|----------------------------|
| 1.            | GNRs          | +46.8 ( $\pm$ 0.8)         |
| 2.            | siRNA         | -11.2 ( $\pm$ 0.6)         |

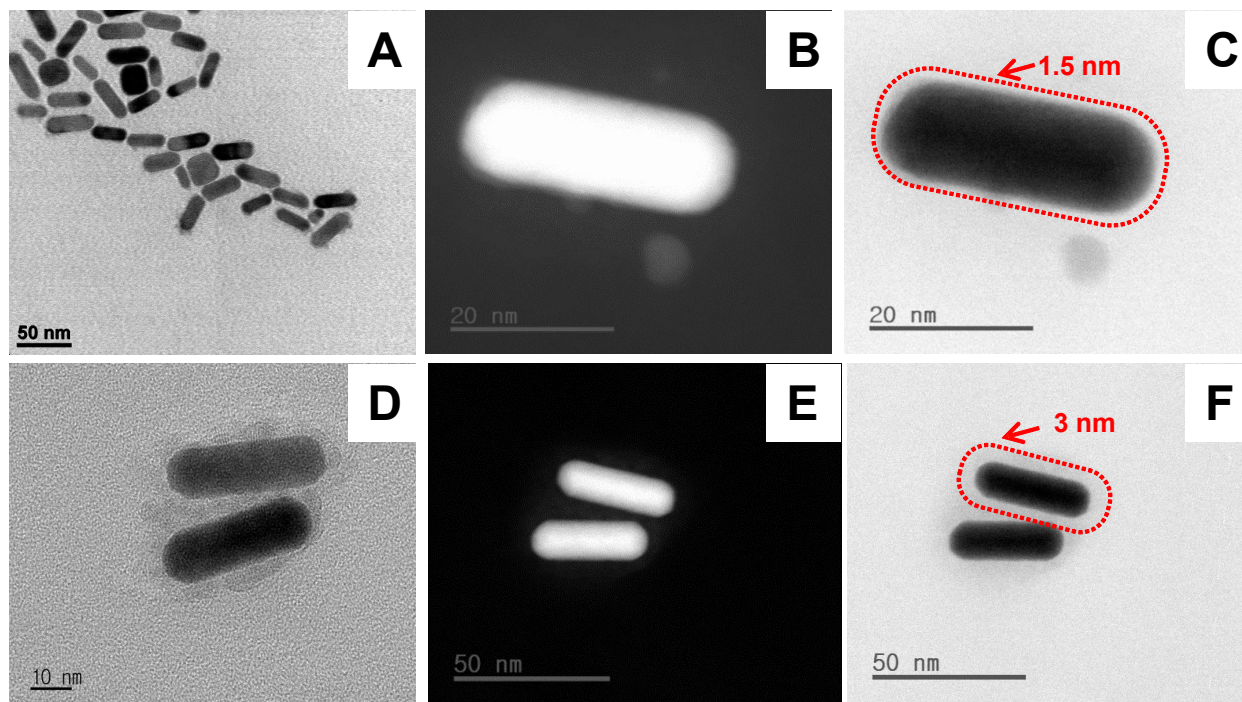

**Fig. S1** (A) TEM image, (B) dark field STEM, and (C) bright field STEM image of siRNA@GNRs. (D) TEM image, (E) dark field STEM, and (F) bright field STEM image of mPEG@siRNA@GNRs.

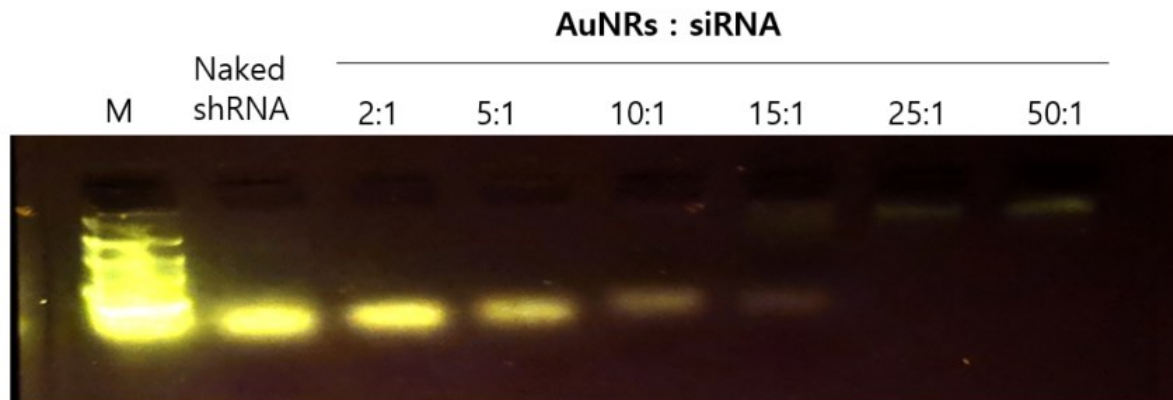

**Fig. S2** Agarose gel electrophoresis retardation assay. GNRs:siRNA at different ratios (2:1, 5:1, 10:1, 15:1, 25:1 and 50:1). M:DNA marker

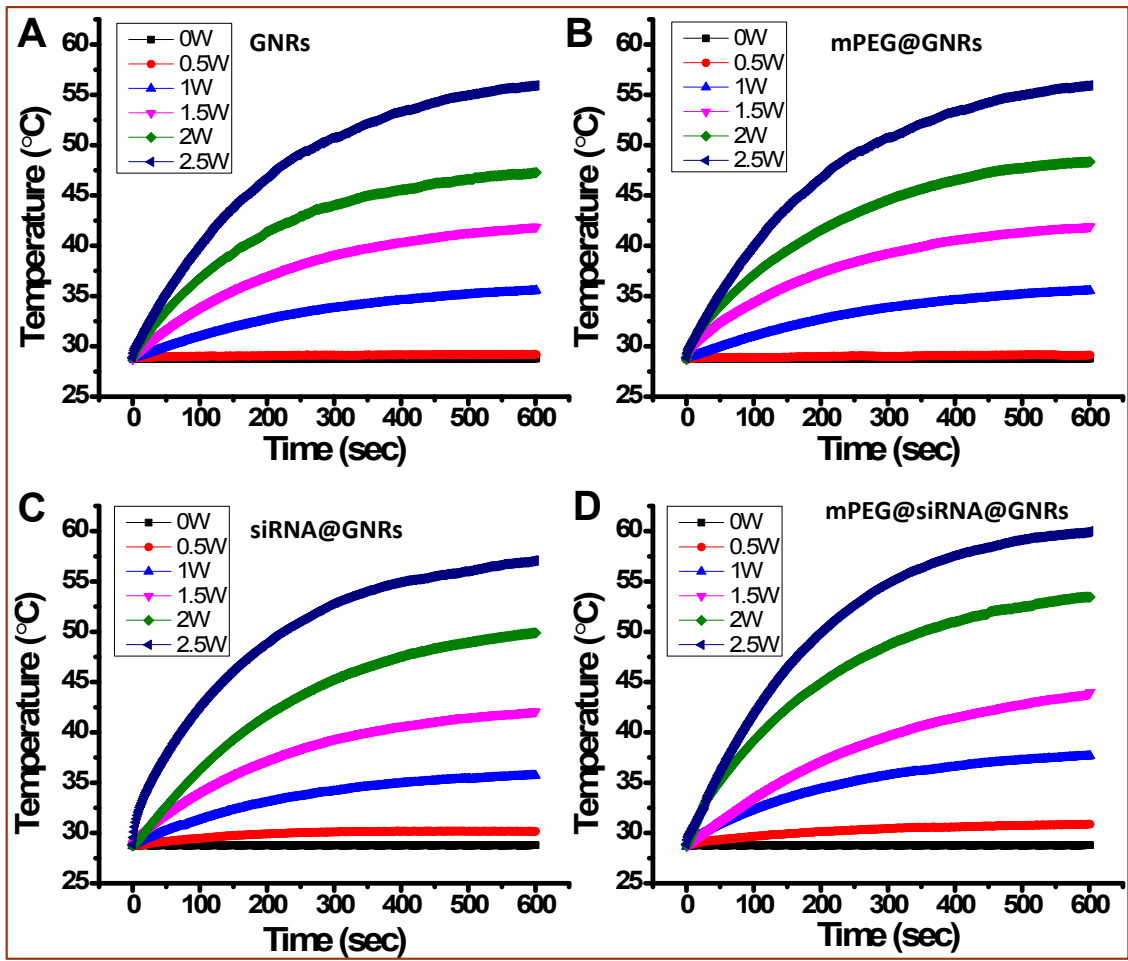

**Fig. S3** The photothermal effect of (A) GNRs, (B) mPEG@GNRs, (C) siRNA@GNRs, and (D) mPEG@siRNA@GNRs at different laser power densities such as 0.5, 1.0, 1.5, 2.0, and 2.5 W.

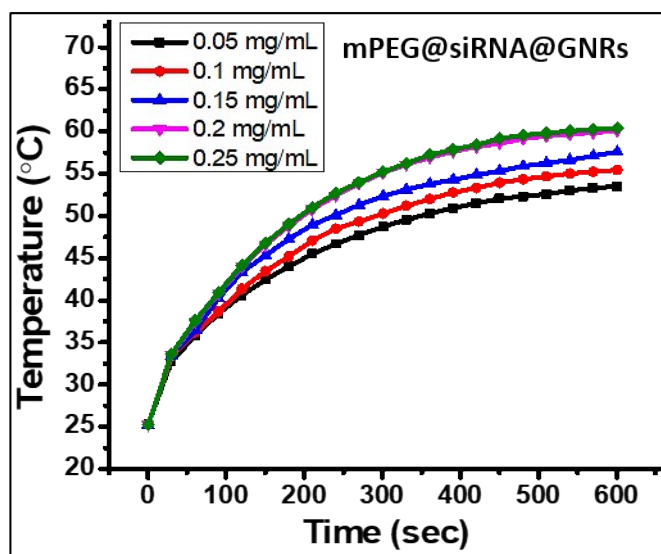

**Fig. S4** The photothermal effect of mPEG@siRNA@GNRs with different concentrations using 2W NIR laser power for 10 min.

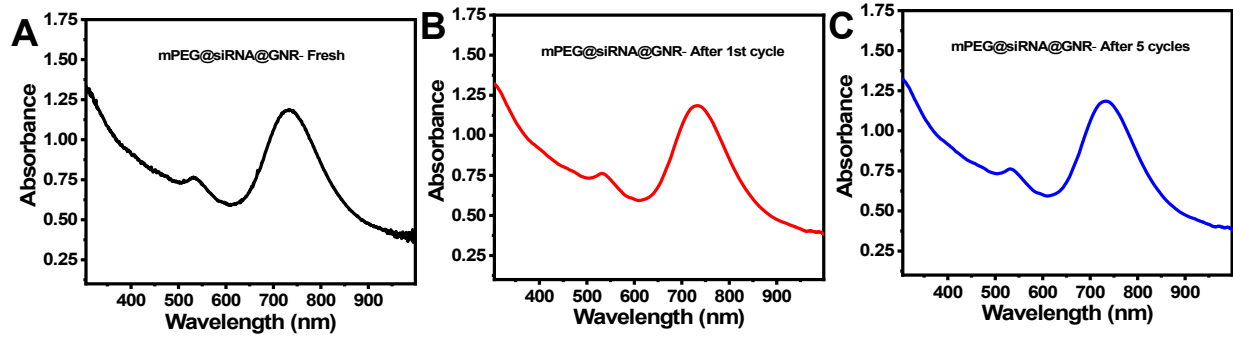

**Fig. S5** UV-Visible spectrum of mPEG@siRNA@GNRs (A) fresh, (B) after 1 cycle, and (C) after 5 cycles.
